# Supplementary material for: In situ observation of the evolution of polyaromatic tar precursors in packed-bed biomass pyrolysis
Source: Royal Society of Chemistry journal article supplement (doi:10.1039/d1re00032b), 2021-01-01
Supplement: d1re00032b1.pdf [file d1re00032b1.pdf]

## Supplementary Information

**Table 1.** Sample weights measured before and after pyrolysis runs and solid mass yields. Weights in grams dry basis (db)

| Holding Temp. | Walnut Shells  |              |              | Almond Shells  |              |              |
|---------------|----------------|--------------|--------------|----------------|--------------|--------------|
|               | Initial (g db) | Final (g db) | Yield (%w/w) | Initial (g db) | Final (g db) | Yield (%w/w) |
| 300°C         | 0.12           | 0.07         | 41.7         | 0.12           | 0.07         | 58.3         |
| 350°C         | 0.12           | 0.05         | 58.3         | 0.12           | 0.05         | 41.7         |
| 450°C         | 0.12           | 0.04         | 33.3         | 0.12           | 0.04         | 33.3         |
| 550°C         | 0.12           | 0.03         | 25.0         | 0.12           | 0.03         | 25.0         |
